# Supplementary material for: MiRNA-181a Regulates Adipogenesis by Targeting Tumor Necrosis Factor-α (TNF-α) in the Porcine Model
Source: PubMed Central journal article supplement (PMC3787936; doi:10.1371/journal.pone.0071568), 2013-10-01

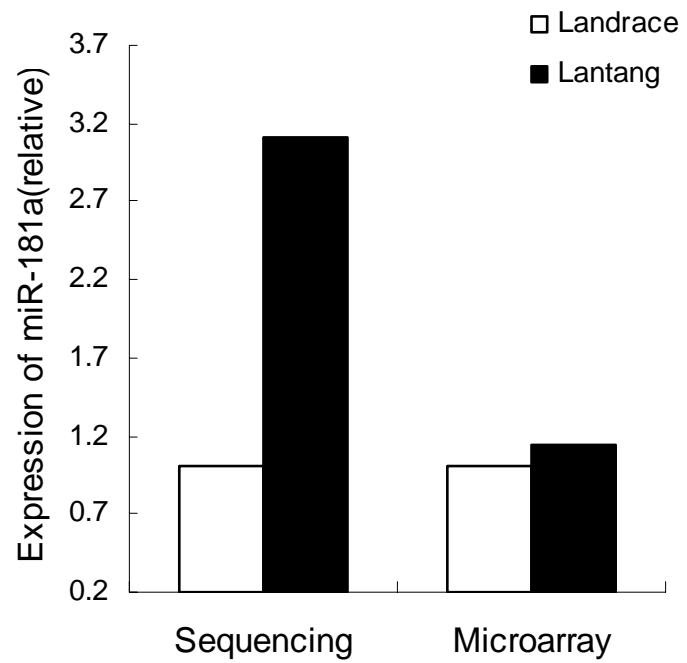

Supplement: pone.0071568.s001.pdf [file pone.0071568.s001.pdf]
